# Supplementary material for: Nesprins: Tissue-Specific Expression of Epsilon and Other Short Isoforms
Source: PubMed Central journal article supplement (PMC3981789; doi:10.1371/journal.pone.0094380), 2014-04-09
Supplement: pone.0094380.s001.pdf [file pone.0094380.s001.pdf]

## Supporting Information

Duong et al. “Nesprins: tissue-specific expression of epsilon and other short isoforms”

**Table S1:** Quantitative PCR primer pairs

| Target (Accession) <sup>a</sup> | Primer Sequence 5' to 3'                                  | Product Size (sequence confirmed) <sup>b</sup> | Efficiency (%)  |
|---------------------------------|-----------------------------------------------------------|------------------------------------------------|-----------------|
| <b>Beta-actin</b> (NM_001101)   | F: CCCTGGAGAAGAGCTACGAG<br>R: TGAAGGTAGTTTCGTGGATGC       | 135bp (skeletal muscle)                        | 100             |
| <b>GAPDH</b> (M33197)           | F: CAGCCTCAAGATCATCAGCA<br>R: GTCTTCTGGGTGGCAGTGAT        | 135bp (skeletal muscle)                        | 96              |
| <b>N1-giant</b> (NM_182961)     | F: AAGCTGAAAGCGAAGACAGA<br>R: GAGCCGATTCTCAGCTTGTC        | 219bp (heart)                                  | 97              |
| <b>N1-beta-1</b> (AY061755)     | F: GTTCTTTTCATTTTGGTGACCATC<br>R: AAGACTTTAGCTTTTCAATCCAC | 283bp (skeletal muscle, spleen)                | 90              |
| <b>N1-beta-2</b> (AY184206)     | F: ACCTGCCCGTCAATGTCATG<br>R: GTCGCAACTCCTCAGTCTCC        | 183bp (thyroid)                                | 95              |
| <b>N1-alpha-1</b> (AY061756)    | F: CCTGATAATTTTGGCTTCAT<br>R: GTCCTCAGGCTGCTCATGTTC       | 268bp (spleen) <sup>c</sup>                    | ND <sup>d</sup> |
| <b>N1-alpha-2</b> (AY184203)    | F: CTCCCAGATTGTAAGTGCATGT<br>R: CTATTGGCTTGGCCAGCTCT      | 145bp (heart)                                  | 108             |
| <b>N2-giant</b> (NM_015180)     | F: CTCTTCCAGAGCTTCACGAGG<br>R: CCATCTGCACCAGCCAGGCAC      | 303bp (heart, [32])                            | 92              |
| <b>N2-gamma</b> (AY061759)      | F: AAACCTTTCCCCCAGTCTCG<br>R: TGCTTTTCTGTGCAACATC         | 315bp (skeletal muscle)                        | 95              |
| <b>N2-epsilon-1</b> (CD654909)  | F: CAGCCGCTTGAGTTGAAGG<br>R: CCATCTGCACCAGCCAGGCAC        | 303bp (Ntera-2, [32])                          | 90              |
| <b>N2-epsilon-2</b> (DB089560)  | F: GGGAACCTGGAGCTTTCGCT<br>R: CGCTGTAGATCCTCTGCTC         | 226bp (ovary)                                  | 97              |
| <b>N2-beta-1</b> (AY061757)     | F: AACAAATTTACCCTGAGTGGATCT<br>R: CTTGAGCCAGTCTCAAAGC     | 276bp (skeletal muscle) <sup>c</sup>           | ND <sup>d</sup> |
| <b>N2-beta-2</b> (AY184205)     | F: GTCTCCCCACTAAACCGTG<br>R: GCGCTGGTTGCCCTCGTGGA         | 386bp (kidney)                                 | 91              |
| <b>N2-alpha-1</b> (AY061758)    | F: CTAACAACCTGGATACTGTGGT<br>R: CCATCCGAAATGGATTTACC      | 390bp (skeletal muscle)                        | 89              |
| <b>N2-alpha-2</b> (AY184204)    | F: CTTGCTGTCTTTCGTTTCAG<br>R: ACCTGACTGCTGCTCTGTGA        | 277bp (kidney)                                 | 105             |

Primer pairs for the endogenous controls and for different isoforms of nesprin-1 (N1) and nesprin-2 (N2).

<sup>a</sup> GenBank accession numbers for human sequences.

<sup>b</sup> Primer pairs were used in conventional PCR with the source of target cDNA as shown. Fidelity of the PCR products was confirmed by sequencing. Sequences from the nesprin-2-giant and nesprin-2-epsilon-1 primer pairs had additionally been confirmed in an earlier study [32].

<sup>c</sup> Conventional PCR with nesprin-1-alpha-1 and nesprin-2-beta-1 primer pairs, with the source of cDNA as shown, gave amplification of the correct products. Quantitative PCR with the same primer pairs was borderline detectable, or not detectable. For these two isoforms, several other combinations of primers were tried, which failed to give products with qPCR (see text).

<sup>d</sup> It was not possible to determine the efficiency of amplification of nesprin-1-alpha-1 or nesprin-2-beta-1. ND = not detected.

**Table S2:** PCR primer pairs used to span the 69bp DV23 regions of nesprin-1 and nesprin-2 and to amplify from within the KASH region of nesprin-2

| Target                                                | Primer Sequence 5' to 3'                                 | Product size (sequence confirmed)       |                    |
|-------------------------------------------------------|----------------------------------------------------------|-----------------------------------------|--------------------|
|                                                       |                                                          | “With” DV23                             | “Without” DV23     |
| Nesprin-1 DV23                                        | F: CTAGATGAGCTCCGACGGTAC<br>R: CCCAGCAGTTTCATGTAGCCT     | 638bp<br>(skeletal muscle, vsmc)        | 569bp<br>(Ntera-2) |
| Nesprin-2 DV23<br>(All N2 isoforms except N2-alpha-1) | F: GGAGCAGCTGATTCAGAAGAG<br>R: GGTTTATAAGGGGTGCTGGA      | 615bp<br>(skeletal muscle)              | 546bp<br>(liver)   |
| Nesprin-2 DV23<br>(N2-alpha-1 only)                   | F: GCCTATGAGTTGATTAATTC<br>R: CCTGTCACCTTCCATTTGCT       | 479bp<br>(skeletal muscle)              | 410bp              |
|                                                       |                                                          | <b>Nesprin-2 “with” KASH</b>            |                    |
| Nesprin-2 +KASH                                       | F: CGAAGAAGACTACAGCTGCACTC<br>R: TAGGGTGGAATGTCCTCGCTTGC | 490bp<br>(skeletal muscle, fibroblasts) |                    |

Following conventional PCR, with the source of target cDNA as shown, fidelity of the PCR products was confirmed by sequencing.

**Table S3:** Relative expression (RE) of nesprin-1 (N1) isoforms in human tissues and cultured cells.

| Sample             | N1-Giant      | N1-beta-1    | N1-beta-2   | N1-alpha-1 | N1-alpha-2  |
|--------------------|---------------|--------------|-------------|------------|-------------|
| 1 Adipose          | 134 ± 58 (3)  | 42 ± 8 (3)   | 6 ± 2 (3)   | nd (2)     | 2 ± 0 (2)   |
| 2 Bladder          | 88 ± 20 (3)   | 6 ± 1 (3)    | 3 ± 0 (3)   | nd (2)     | <1 (2)      |
| 3 Brain            | 166 ± 76 (3)  | 1 ± 0 (3)    | 3 ± 1 (3)   | nd (2)     | <1 (2)      |
| 4 Cervix           | 170 ± 35 (3)  | 3 ± 1 (3)    | 3 ± 1 (3)   | nd (2)     | <1 (2)      |
| 5 Colon            | 130 ± 58 (3)  | 6 ± 2 (4)    | 6 ± 0 (3)   | nd (2)     | 1 ± 1 (3)   |
| 6 Esophagus        | 46 ± 28 (3)   | 5 ± 1 (4)    | 1 ± 0 (3)   | nd (2)     | 1 ± 1 (3)   |
| 7 Heart            | 148 ± 24 (3)  | 21 ± 9 (4)   | 4 ± 2 (3)   | nd (2)     | 76 ± 19 (3) |
| 8 Kidney           | 226 ± 56 (3)  | 7 ± 1 (3)    | 9 ± 5 (3)   | nd (2)     | 1 ± 0 (2)   |
| 9 Liver            | 16 ± 5 (3)    | 1 ± 1 (3)    | 1 ± 0 (3)   | nd (2)     | 1 ± 0 (2)   |
| 10 Lung            | 214 ± 51 (3)  | 12 ± 3 (3)   | 5 ± 1 (3)   | nd (2)     | 2 ± 2 (2)   |
| 11 Ovary           | 338 ± 107 (4) | 3 ± 3 (3)    | 4 ± 1 (3)   | nd (2)     | <1 (2)      |
| 12 Placenta        | 38 ± 11 (3)   | 2 ± 0 (3)    | 2 ± 0 (3)   | nd (2)     | 1 ± 0 (2)   |
| 13 Prostate        | 206 ± 79 (4)  | 2 ± 1 (4)    | 8 ± 1 (3)   | nd (2)     | <1 (2)      |
| 14 Skeletal Muscle | 87 ± 26 (3)   | 10 ± 3 (3)   | 1 ± 0 (3)   | nd (2)     | 55 ± 18 (3) |
| 15 Small Intestine | 54 ± 11 (3)   | 3 ± 1 (3)    | 1 ± 0 (3)   | nd (2)     | <1 (2)      |
| 16 Spleen          | 118 ± 26 (3)  | 223 ± 22 (4) | 12 ± 4 (3)  | nd (2)     | 1 ± 1 (2)   |
| 17 Testis          | 149 ± 25 (3)  | 3 ± 1 (3)    | 12 ± 15 (3) | nd (2)     | <1 (2)      |
| 18 Thymus          | 36 ± 6 (3)    | <1 (3)       | 1 ± 1 (3)   | nd (2)     | <1 (2)      |
| 19 Thyroid         | 562 ± 184 (3) | 16 ± 3 (3)   | 25 ± 9 (3)  | nd (2)     | <1 (2)      |
| 20 Trachea         | 109 ± 40 (3)  | 4 ± 3 (3)    | 3 ± 1 (3)   | nd (2)     | 1 ± 0 (2)   |
| 21 ESC             | <1 (3)        | <1 (2)       | <1 (2)      | nd (2)     | nd (2)      |
| 22 Fibroblast      | 19 ± 2 (3)    | <1 (2)       | <1 (2)      | nd (2)     | <1 (2)      |
| 23 LCL             | 3 ± 1 (3)     | <1 (3)       | <1 (3)      | nd (2)     | <1 (2)      |
| 24 Ntera-2         | <1 (3)        | nd (3)       | <1 (3)      | nd (2)     | <1 (2)      |
| 25 HeLa            | <1 (3)        | <1 (4)       | <1 (3)      | nd (2)     | <1 (2)      |
| 26 U2OS            | 11 ± 4 (3)    | <1 (3)       | <1 (3)      | nd (2)     | nd (2)      |
| 27 VSMC            | 166 ± 38 (3)  | 3 ± 0 (3)    | 9 ± 1 (3)   | nd (2)     | <1 (2)      |

Results of qPCR are shown as Mean Relative Expression ± SD (number of measurements). nd = Not detected.

**Table S4:** Relative expression (RE) of nesprin-2 (N2) isoforms in human tissues and cultured cells.

| Sample             | N2-Giant       | N2-gamma  | N2-epsilon-1 | N2-epsilon-2 | N2-beta-1 | N2-beta-2 | N2-alpha-1    | N2-alpha-2  |
|--------------------|----------------|-----------|--------------|--------------|-----------|-----------|---------------|-------------|
| 1 Adipose          | 340 ± 57 (3)   | 3 ± 2 (4) | 2 ± 1 (2)    | 3 ± 0 (3)    | <1 (3)    | 3 ± 1 (3) | 1 ± 2 (3)     | <1 (2)      |
| 2 Bladder          | 94 ± 35 (3)    | 1 ± 0 (2) | <1 (2)       | 3 ± 0 (3)    | <1 (2)    | 4 ± 0 (2) | <1 (3)        | 1 ± 0 (2)   |
| 3 Brain            | 17 ± 10 (3)    | <1 (3)    | <1 (2)       | 19 ± 1 (3)   | <1 (3)    | <1 (2)    | <1 (3)        | <1 (3)      |
| 4 Cervix           | 251 ± 13 (3)   | 2 ± 0 (3) | 1 ± 0 (2)    | 2 ± 0 (3)    | <1 (5)    | 4 ± 0 (2) | <1 (3)        | 1 ± 0 (2)   |
| 5 Colon            | 192 ± 77 (3)   | 1 ± 0 (2) | 1 ± 0 (2)    | 3 ± 0 (3)    | <1 (2)    | 3 ± 1 (3) | <1 (3)        | 2 ± 1 (5)   |
| 6 Esophagus        | 260 ± 109 (3)  | 1 ± 0 (2) | 2 ± 3 (2)    | nd (3)       | <1 (2)    | 2 ± 1 (3) | 3 ± 2 (3)     | 1 ± 0 (2)   |
| 7 Heart            | 196 ± 77 (3)   | 1 ± 0 (3) | <1 (6)       | 42 ± 5 (5)   | <1 (5)    | <1 (2)    | 55 ± 72 (5)   | 4 ± 4 (3)   |
| 8 Kidney           | 1231 ± 182 (3) | 3 ± 0 (3) | 5 ± 0 (3)    | 3 ± 1 (3)    | <1 (3)    | 9 ± 1 (3) | <1 (3)        | 36 ± 14 (3) |
| 9 Liver            | 552 ± 76 (3)   | <1 (2)    | 2 ± 1 (2)    | 2 ± 1 (3)    | <1 (2)    | 8 ± 1 (3) | 1 ± 1 (3)     | 8 ± 3 (3)   |
| 10 Lung            | 269 ± 43 (3)   | 2 ± 1 (2) | 1 ± 1 (2)    | 9 ± 0 (3)    | <1 (4)    | 1 ± 1 (3) | <1 (3)        | 3 ± 0 (3)   |
| 11 Ovary           | 355 ± 93 (3)   | 1 ± 1 (3) | 34 ± 9 (6)   | 30 ± 4 (5)   | <1 (4)    | <1 (2)    | 1 ± 0 (3)     | 3 ± 3 (3)   |
| 12 Placenta        | 551 ± 113 (3)  | 3 ± 2 (3) | 4 ± 2 (2)    | 1 ± 0 (3)    | <1 (3)    | 9 ± 3 (3) | <1 (3)        | 8 ± 4 (3)   |
| 13 Prostate        | 212 ± 11 (3)   | 2 ± 0 (2) | 2 ± 1 (2)    | 20 ± 3 (3)   | <1 (4)    | 3 ± 2 (3) | 2 ± 0 (3)     | 3 ± 1 (3)   |
| 14 Skeletal Muscle | 636 ± 233 (3)  | 1 ± 0 (3) | 1 ± 0 (2)    | 2 ± 0 (3)    | <1 (3)    | 1 ± 0 (2) | 315 ± 177 (3) | <1 (3)      |
| 15 Small Intestine | 234 ± 10 (3)   | 2 ± 0 (2) | 1 ± 0 (2)    | 3 ± 0 (3)    | <1 (2)    | 1 ± 0 (2) | <1 (3)        | 6 ± 2 (4)   |
| 16 Spleen          | 197 ± 56 (3)   | 1 ± 0 (2) | 1 ± 0 (2)    | 7 ± 0 (3)    | <1 (3)    | 2 ± 1 (3) | <1 (3)        | 2 ± 1 (3)   |
| 17 Testis          | 206 ± 90 (3)   | 2 ± 2 (3) | 12 ± 8 (3)   | 48 ± 1 (3)   | <1 (2)    | 4 ± 0 (3) | 1 ± 1 (3)     | 1 ± 0 (3)   |
| 18 Thymus          | 111 ± 14 (3)   | <1 (2)    | <1 (2)       | 17 ± 1 (3)   | <1 (2)    | 1 ± 0 (2) | <1 (3)        | <1 (2)      |
| 19 Thyroid         | 1139 ± 290 (3) | 5 ± 1 (4) | 5 ± 1 (6)    | 44 ± 10 (5)  | <1 (4)    | 6 ± 6 (3) | 9 ± 3 (3)     | 9 ± 5 (3)   |
| 20 Trachea         | 318 ± 22 (3)   | 2 ± 0 (2) | 1 ± 0 (2)    | 2 ± 1 (3)    | <1 (4)    | 6 ± 4 (3) | 1 ± 1 (3)     | 2 ± 1 (3)   |
| 21 ESC             | 88 ± 44 (3)    | <1 (4)    | 23 ± 7 (5)   | <1 (3)       | <1 (3)    | <1 (2)    | nd (3)        | 2 ± 0 (3)   |
| 22 Fibroblast      | 60 ± 12 (3)    | <1 (4)    | <1 (2)       | <1 (2)       | <1 (3)    | <1 (2)    | nd (3)        | 1 ± 0 (3)   |
| 23 LCL             | 193 ± 41 (3)   | <1 (3)    | <1 (2)       | <1 (2)       | <1 (3)    | 1 ± 0 (2) | <1 (3)        | 2 ± 1 (3)   |
| 24 Ntera-2         | 53 ± 9 (3)     | <1 (4)    | 71 ± 10 (5)  | <1 (5)       | <1 (3)    | <1 (2)    | <1 (3)        | 6 ± 2 (3)   |
| 25 HeLa            | 99 ± 27 (4)    | <1 (2)    | <1 (2)       | nd (2)       | <1 (3)    | <1 (3)    | <1 (2)        | 3 ± 1 (3)   |
| 26 U2OS            | 19 ± 3 (3)     | <1 (2)    | <1 (2)       | nd (2)       | <1 (2)    | <1 (2)    | nd (2)        | <1 (2)      |
| 27 VSMC            | 3 ± 1 (3)      | <1 (2)    | <1 (2)       | nd (2)       | <1 (2)    | <1 (2)    | nd (2)        | nd (2)      |

Results of qPCR are shown as Mean Relative Expression ± SD (number of measurements). nd = Not detected.
